# Supplementary material for: Risk Assessment of the Worldwide Expansion and Outbreak of Massicus raddei (Blessig) (Coleoptera: Cerambycidae) Based on Host Plant and Climatic Factors
Source: MDPI journal article supplement (doi:10.3390/insects13080730), 2022-08-15
Supplement: s1 [file s1]

Table S1 Distributional locations of *Massicus raddei* obtained from field investigations in China

| Distributional points of <i>M. raddei</i> through field investigations | Longitude (°E) | Latitude (°N) |
|------------------------------------------------------------------------|----------------|---------------|
| Kunyu mountain, Yantai , Shandong                                      | 121.75         | 37.29         |
| Fangshan silkworm field, Qixia, Shandong                               | 120.44         | 37.13         |
| Xilu temple, Hefei, Anhui                                              | 117.00         | 31.72         |
| Shushan martyrs cemetery, Hefei, Anhui                                 | 117.18         | 31.84         |
| Sishan forest park, Xixia, Henan                                       | 111.28         | 33.17         |
| Mangdangshan nature reserve, Nanping, Fujian                           | 118.10         | 26.71         |
| Pingbian Dawei mountain, Honghe, Yunnan                                | 103.41         | 22.56         |
| Panlong forest park, Wenshan, Yunnan                                   | 104.15         | 23.21         |
